# Supplementary material
Source: HighWire-hosted journal article supplement (https://bmjopen.bmj.com/content/12/6/e060524)
Supplement: inline-supplementary-material-1 [file inline-supplementary-material-1.pdf]

## Appendix 1: Search strategy for each included database

**MEDLINE OVID** (Ovid MEDLINE(R) and Epub Ahead of Print, In-Process, In-Data-Review & Other Non-Indexed Citations, Daily and Versions(R) 1946 to March 10, 2021)

1. practice-based research network\*.mp. [mp=title, abstract, original title, name of substance word, subject heading word, floating sub-heading word, keyword heading word, organism supplementary concept word, protocol supplementary concept word, rare disease supplementary concept word, unique identifier, synonyms]
2. PBRN\*.mp. [mp=title, abstract, original title, name of substance word, subject heading word, floating sub-heading word, keyword heading word, organism supplementary concept word, protocol supplementary concept word, rare disease supplementary concept word, unique identifier, synonyms]
3. practice-based research.mp. [mp=title, abstract, original title, name of substance word, subject heading word, floating sub-heading word, keyword heading word, organism supplementary concept word, protocol supplementary concept word, rare disease supplementary concept word, unique identifier, synonyms]
4. practice research network\*
5. 1 or 2 or 3 or 4

### EMBASE (via Ovid)

1. practice-based research network\*.mp
2. PBRN\*.mp
3. practice-based research.mp
4. practice research network\*
5. 1 or 2 or 3 or 4

### CINAHL plus

1. "practice-based research network\*"
2. PBRN\*
3. "practice-based research"
4. "practice research network\*"
5. 1 or 2 or 3

### SCOPUS

( TITLE-ABS-KEY ( "practice-based AND research AND network\*" ) OR TITLE-ABS-KEY ( pbrn\* ) AND TITLE-ABS-KEY ( "practice-based AND research" ) OR TITLE-ABS-KEY ( "practice AND research" AND network\*" ) )
