# Supplementary material
Source: HighWire-hosted journal article supplement (https://bmjopen.bmj.com/content/12/6/e060524)
Supplement: inline-supplementary-material-2 [file inline-supplementary-material-2.pdf]

## Appendix 2: Interview guides for assessing stakeholders' needs

### Interview guide for stakeholders working within general practices (GPs, Practice Nurses and Practice managers)

#### Introduction

- Can you tell me a bit about yourself?
- Can you tell me a bit about the practice you work for?
- What is your current role in this practice?

#### Personal experience with research

- Can you tell me about your personal experiences with research in general practice?
  - *Prompt: What worked well for you? What did not work well? What is important to you if you are involved in research?*

#### Data-led health care improvements

- Describe your experiences with data led health care improvement
- What barriers do you see between research and research translation into practice?
- How might those barriers be overcome?

#### Practice-based research network

- What kind of partnerships, if any, do you foresee between general practices, other healthcare professionals, researchers and data?
- Within the Department of General Practice, Monash University, there is an existing foundation, the Monash practice-based Research Network. Practice-Based Research Networks (PBRNs) are groups of GP practices, other healthcare staff and researchers who come together to develop, undertake and report on research relevant to local health needs. We would like to build on this existing foundation and strengthen the network.
  - Which challenges do you see for this network?
  - Which opportunities are possible?

#### Needs/opportunities

- What could motivate you to be part of such a network?
- In which way can such a network make your work at the practice easier?
- What do you think that you need in order to benefit from such a network?
  - *Prompt: What is important for you? What are priorities in your view? (research and non-research related aspects)*

#### Additional information

- Years of experience at the current practice
- Practice size (in full-time FTE equivalent)
- Past involvement with PBR(N)
- Past academic Primary care involvement (teaching or research)

#### Other interviewees

- Are there any other people we should speak to about this topic?

## Interview guide for other healthcare staff and community members

### Introduction

- Can you tell me a bit about yourself?
- Can you tell me a bit about the organisation you work for?
- What is your current role in this organisation?

### Personal experience with research

- Can you tell me about your personal experiences with research?
  - *Prompt: What worked well for you? What did not work well? What is important to you if you are involved in research?*

### Data-led health care improvements

- Describe your experiences with data led health care improvement
- How well would you say research and data is being used to improve health services?
- What barriers do you see between research and research translation into practice?
- How might those barriers be overcome?

### Practice-based research network on integrated care

- What kind of partnerships, if any, do you foresee between general practices, other healthcare professionals, researchers and data?
- Within the Department of General Practice, Monash University, there is an existing foundation, the Monash practice-based Research Network. Practice-Based Research Networks (PBRNs) are groups of GP practices, other healthcare staff and researchers who come together to develop, undertake and report on research relevant to local health needs. We would like to build on this existing foundation and strengthen the network.
  - Which challenges do you see for this network?
  - Which opportunities are possible?

### Needs/opportunities

- What could motivate you to be part of such a network?
- In which way can such a network make your work easier?
- What do you think that you need in order to benefit from such a network?
  - *Prompt: What is important for you? What are priorities in your view? (research and non-research related aspects)*

### Other interviewees

- Are there any other people we should speak to about this topic?

## Interview guide for academics

### Introduction

- Can you tell me a bit about yourself?
- Can you tell me a bit about the organisation you work for?
- What is your current role in this organisation?

### Personal experience with research

- Can you tell me about your personal experiences with research in integrated care?
  - *Prompt: What worked well for you? What did not work well? What is important to you?*

### Data-led health care improvements

- Describe your experiences with data led health care improvement
- How well would you say research and data is being used to improve health services?
- What barriers do you see between research and research translation into practice?
- How might those barriers be overcome?

### Practice-based research network on integrated care

- What kind of partnerships, if any, do you foresee between general practices, other healthcare professionals, researchers and data?
- Within the Department of General Practice, Monash University, there is an existing foundation, the Monash practice-based Research Network. Practice-Based Research Networks (PBRNs) are groups of GP practices, other healthcare staff and researchers who come together to develop, undertake and report on research relevant to local health needs. We would like to build on this existing foundation and strengthen the network.
  - Which challenges do you see for this network?
  - Which opportunities are possible?

### Needs/opportunities

- What could motivate you to be part of such a network?
- In which way can such a network make your work easier?
- What do you think that you need in order to benefit from such a network?
  - *Prompt: What is important for you? What are priorities in your view? (research and non-research related aspects)*

### Other interviewees

- Are there any other people we should speak to about this topic?
