# Supplementary material
Source: HighWire-hosted journal article supplement (https://bmjopen.bmj.com/content/12/6/e060524)
Supplement: inline-supplementary-material-3 [file inline-supplementary-material-3.pdf]

**Appendix 3: Running sheet for the group discussion**

| Time              | Item                                                                                                                                                                                                                                                                                                                                                                                                                                                                                                                                                             | Gear required                                                    | Set up                   |
|-------------------|------------------------------------------------------------------------------------------------------------------------------------------------------------------------------------------------------------------------------------------------------------------------------------------------------------------------------------------------------------------------------------------------------------------------------------------------------------------------------------------------------------------------------------------------------------------|------------------------------------------------------------------|--------------------------|
| 7am (10mins)      | <b>Registration &amp; coffee/breakfast</b><br><b>CONSENT FORMS</b>                                                                                                                                                                                                                                                                                                                                                                                                                                                                                               | Name tags<br>Signup sheet<br>Consent form<br>Coffee<br>Breakfast | Registration desk        |
| 7:10am (10mins)   | <b>Intro to the integrated PBRN project</b><br>Welcome, vision of the collaboration, overview of the project, key findings of the scoping review and interviews, the purpose of the group discussion                                                                                                                                                                                                                                                                                                                                                             | Powerpoint presentation<br>Projector<br>Screen                   | Seated, facing the front |
| 7:20am (5mins)    | <b>Intro to NGT process (facilitator)</b><br>Facilitator describes what we're doing and how it's going to work                                                                                                                                                                                                                                                                                                                                                                                                                                                   |                                                                  |                          |
| 7:25am (5mins)    | <b>Silent idea generation</b><br>The participants respond to the following three questions by recording their ideas independently and privately on paper:<br><ol style="list-style-type: none"> <li>1) What kind of collaboration do you foresee between general practices, other healthcare professionals, researchers and data networks?</li> <li>2) Which research priorities do you suggest for such a collaboration?</li> <li>3) Which non-research related aspects are important in order to make this collaboration as successful as possible?</li> </ol> | Paper<br>Pens/ textas                                            |                          |
| 7:30am (20mins)   | <b>Small group discussions</b><br>These ideas are shared in small groups of 4 to 5 individuals.                                                                                                                                                                                                                                                                                                                                                                                                                                                                  | Paper<br>Pens/ textas                                            | 10 tables                |
| 7:50am (20mins)   | <b>Big group discussion</b><br>These ideas are then shared with the big group, with each small group sharing one item from their list. All ideas are recorded by a facilitator who documents the responses until all participants have no more original ideas. A flip chart or list of the responses is posted for all to see (with three different columns – one column of each question).<br>The facilitator then leads a group discussion where each idea is discussed in turn, with similar ideas grouped together, and clarification provided.              | Paper/flip charts<br>Textas                                      |                          |
| 8.10am (10mins)   | <b>Coffee break</b>                                                                                                                                                                                                                                                                                                                                                                                                                                                                                                                                              |                                                                  |                          |
| 8.20 am (35 mins) | <b>Prioritisation</b><br>The prioritization process is about the following two questions:                                                                                                                                                                                                                                                                                                                                                                                                                                                                        |                                                                  |                          |

|                    |                                                                                                                                                                                                                                                                                                                                                                                                                                                                                                                                                                                                                                                                                                                                                                                                                                                                                |                 |  |
|--------------------|--------------------------------------------------------------------------------------------------------------------------------------------------------------------------------------------------------------------------------------------------------------------------------------------------------------------------------------------------------------------------------------------------------------------------------------------------------------------------------------------------------------------------------------------------------------------------------------------------------------------------------------------------------------------------------------------------------------------------------------------------------------------------------------------------------------------------------------------------------------------------------|-----------------|--|
|                    | <ul style="list-style-type: none"> <li>• Which <b>research priorities</b> do you suggest for the collaboration?</li> <li>• Which <b>non-research related</b> aspects are important in order to make this collaboration as successful as possible?</li> </ul> <p>Participants discuss (10mins) in their small groups which of the identified needs (research and non-research aspects) matter most to them.</p> <p>Afterwards, individuals vote privately on the items. They use a 'hot dot' (red coloured circle sticker) to stick next to what they feel are the main priorities. Each individual gets 6 stickers (3 stickers for non-research related aspects and 3 for research priorities).</p> <p>The results are anonymously fed back to the group and discussed to reach a consensus about the three main priorities for research and non-research related aspects.</p> | Stickers        |  |
| 8.55 am<br>(5mins) | <b>Summary/thanks/etc</b>                                                                                                                                                                                                                                                                                                                                                                                                                                                                                                                                                                                                                                                                                                                                                                                                                                                      | Evaluation form |  |
