# Supplementary material
Source: HighWire-hosted journal article supplement (https://bmjopen.bmj.com/content/12/6/e060524)
Supplement: inline-supplementary-material-4 [file inline-supplementary-material-4.pdf]

**Appendix 4: Evaluation form of the group discussion**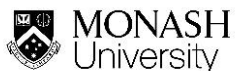**Evaluation form**

| <b>Please rate the following by ticking your response:</b>                                             | <b>Strongly Disagree</b> | <b>Disagree</b> | <b>Neutral</b> | <b>Agree</b> | <b>Strongly Agree</b> |
|--------------------------------------------------------------------------------------------------------|--------------------------|-----------------|----------------|--------------|-----------------------|
| I had the chance to have my say at this group discussion.                                              |                          |                 |                |              |                       |
| The facilitator encouraged the airing of wide range of perspectives.                                   |                          |                 |                |              |                       |
| The group decisions reflect my personal views.                                                         |                          |                 |                |              |                       |
| I have a good understanding of how the collaboration could work in our region.                         |                          |                 |                |              |                       |
| Today's event gave me an opportunity to network with professionals from other practices/organisations. |                          |                 |                |              |                       |
| The group discussion was a worthwhile use of my time.                                                  |                          |                 |                |              |                       |

**What were the best aspects of this group discussion?**


---



---



---



---



---



---

**What could we have done better?**


---



---



---



---

---

---

**Would you, or your organisation, be interested in exploring the possibility of participating in future activities of this collaboration?**

No: *Please provide a reason (optional):*

---

---

Yes: *Please provide details of the most appropriate contact:*

Name: \_\_\_\_\_

Organisation: \_\_\_\_\_

Email: \_\_\_\_\_

Phone: \_\_\_\_\_

Not applicable

**Do you have any further comments or suggestions on this work?**

---

---

---

---

---

---
